# Supplementary material
Source: PubMed Central journal article supplement (PMC2882727)
Supplement: supp_M005611_jlr.M005611-1.pdf [file supp_M005611_jlr.M005611-1.pdf]

## Effect of anti-VAMP7 Antibody on ER PCTV Budding Activity

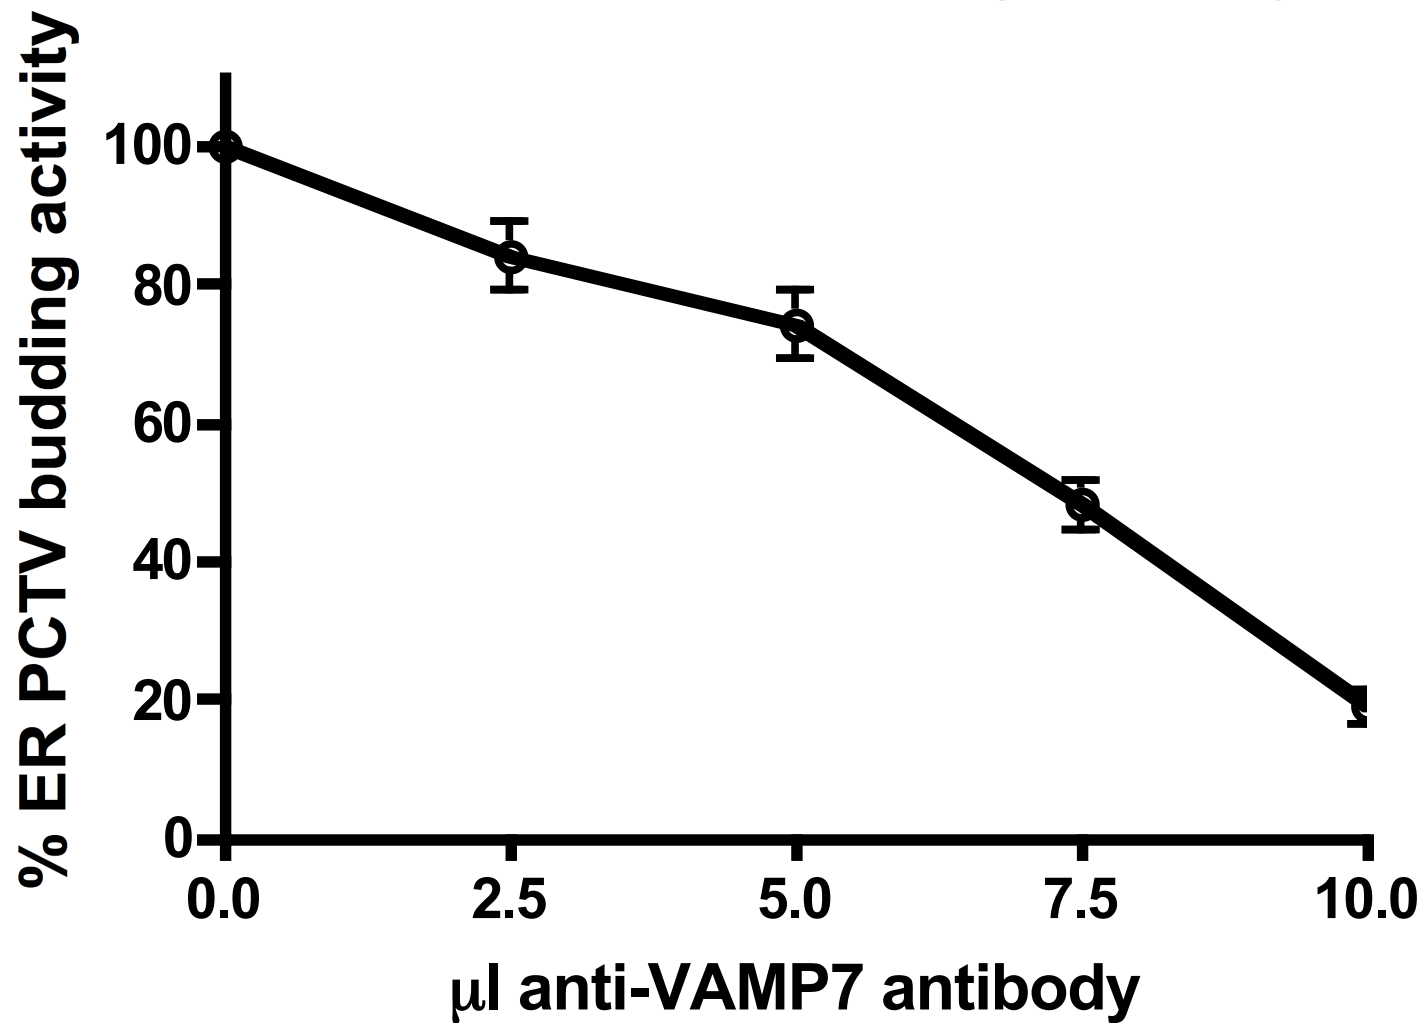

Fig. S1

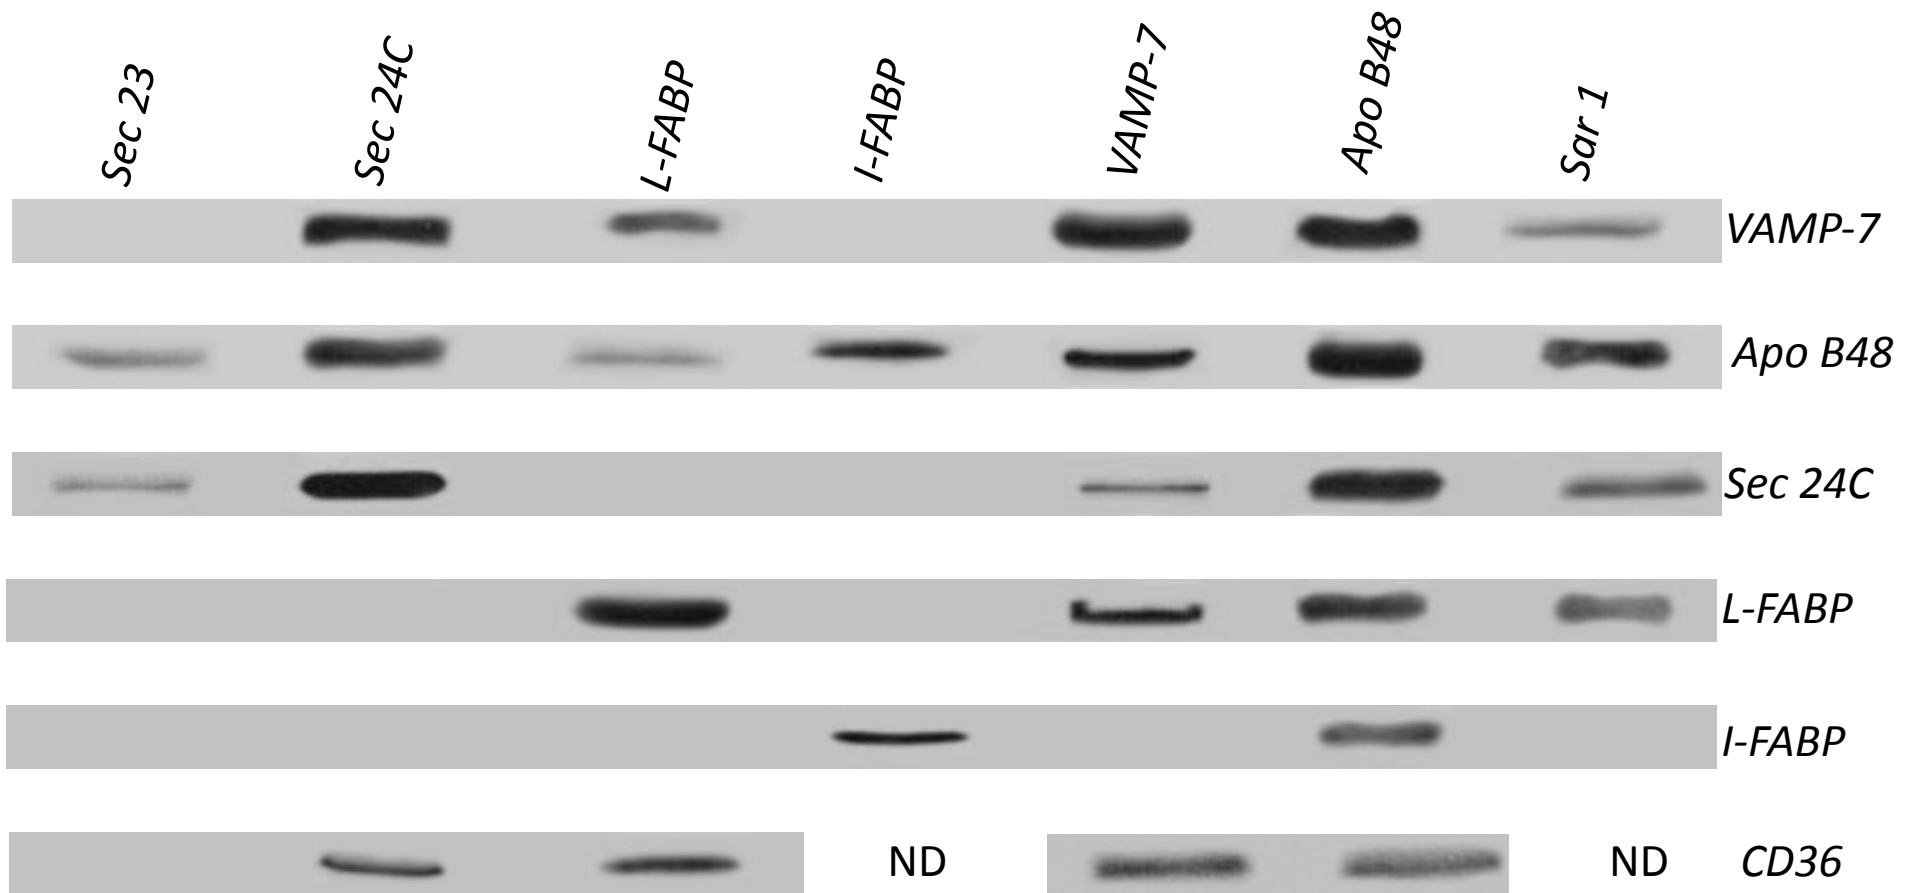

The immunoblots shown represent the original data from which Table 1 was derived. It follows exactly the same format as Table 1. Antibodies to the proteins shown on the right hand side were used for immuno-precipitation studies and the proteins associated with the initiating immuno-precipitated protein are shown at the top.

Fig. S2

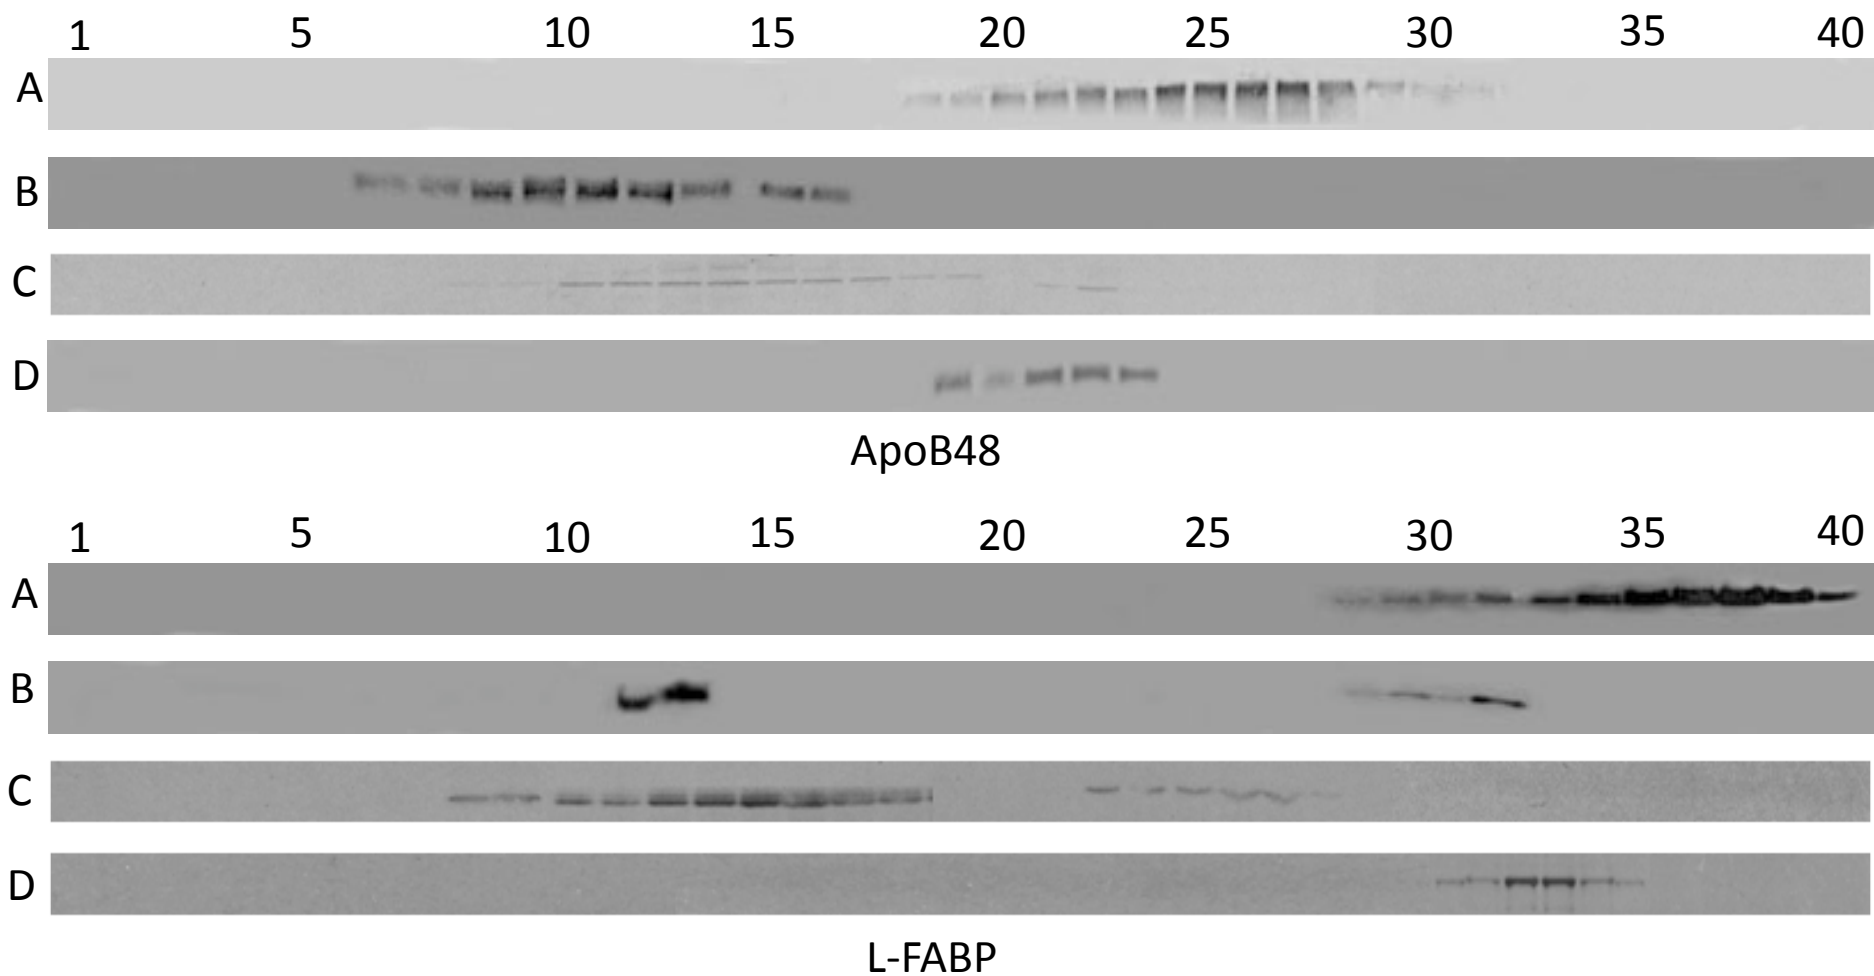

Immunoblots showing the distribution of apoB48 and L-FABP across the Sephacryl S400 column as indicated. These data are the original data from which the data shown in Figs. 1 and 2 were derived.

Fig. S3

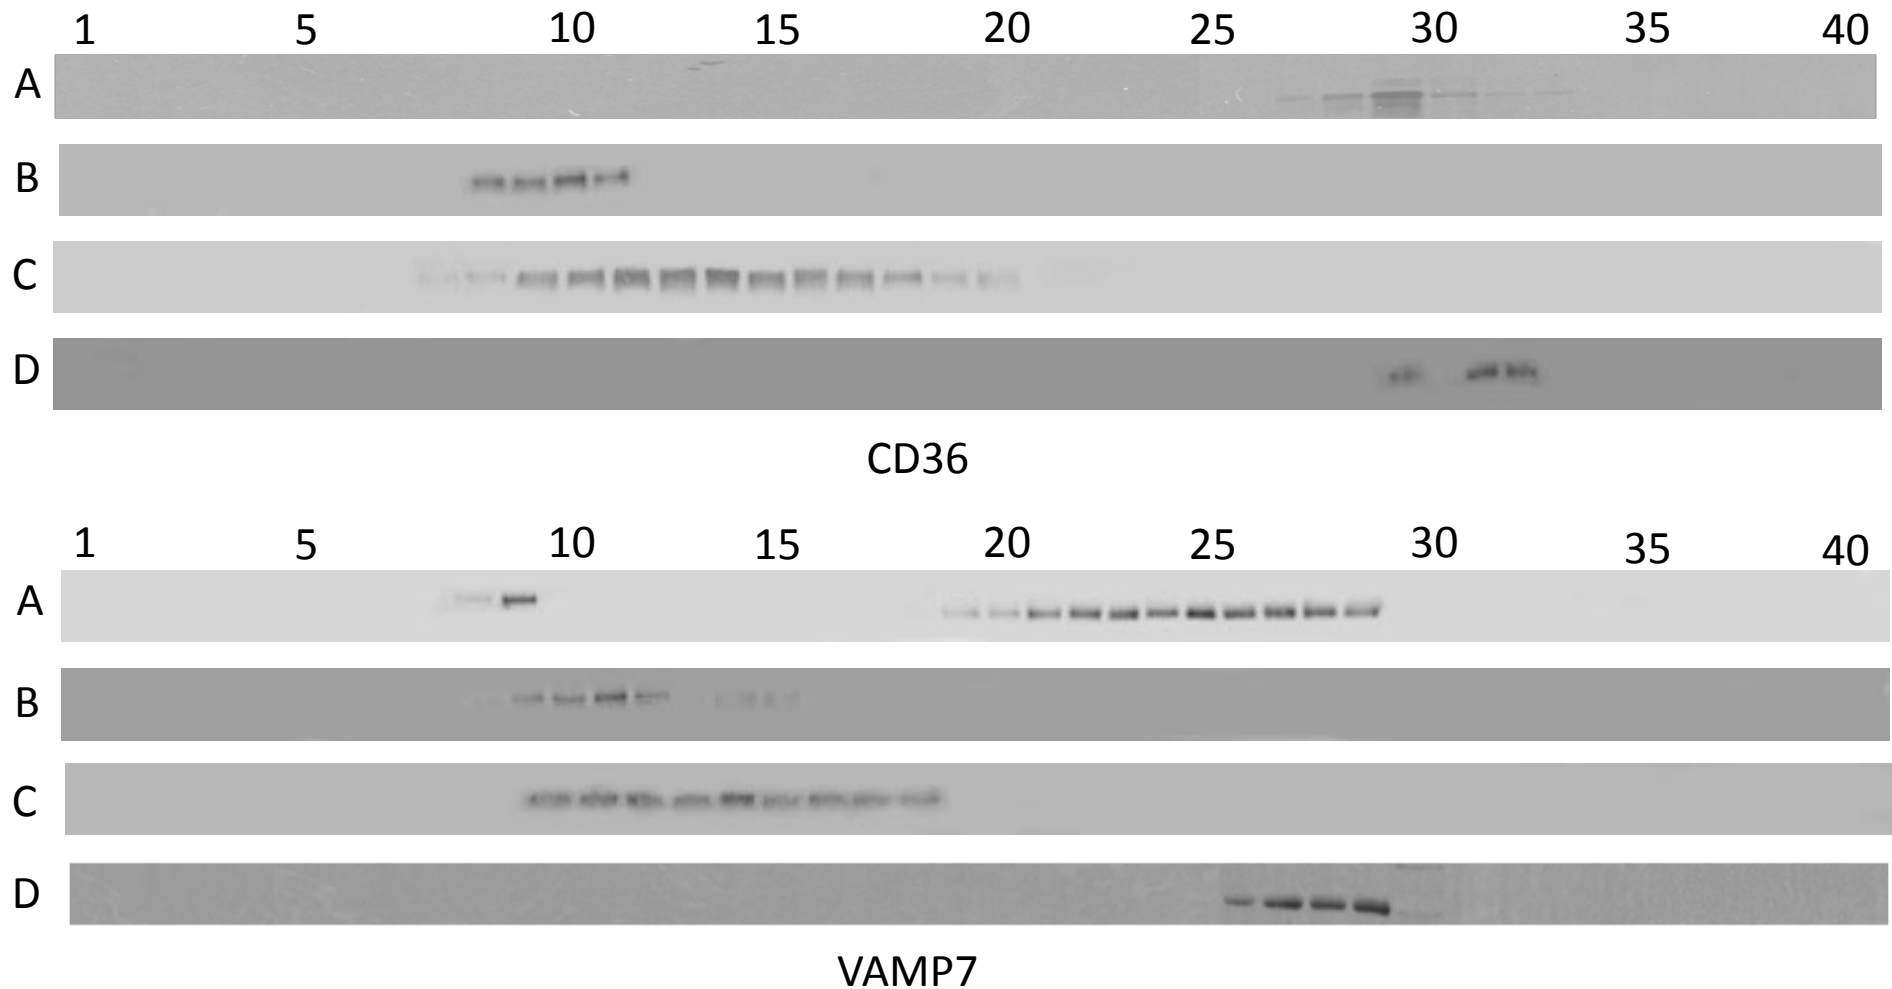

Immunoblots showing the distribution of apoB48 and L-FABP across the Sephacryl S400 column as indicated. These data are the original data from which the data shown in Figs. 3 and 4 were derived.

Fig. S4

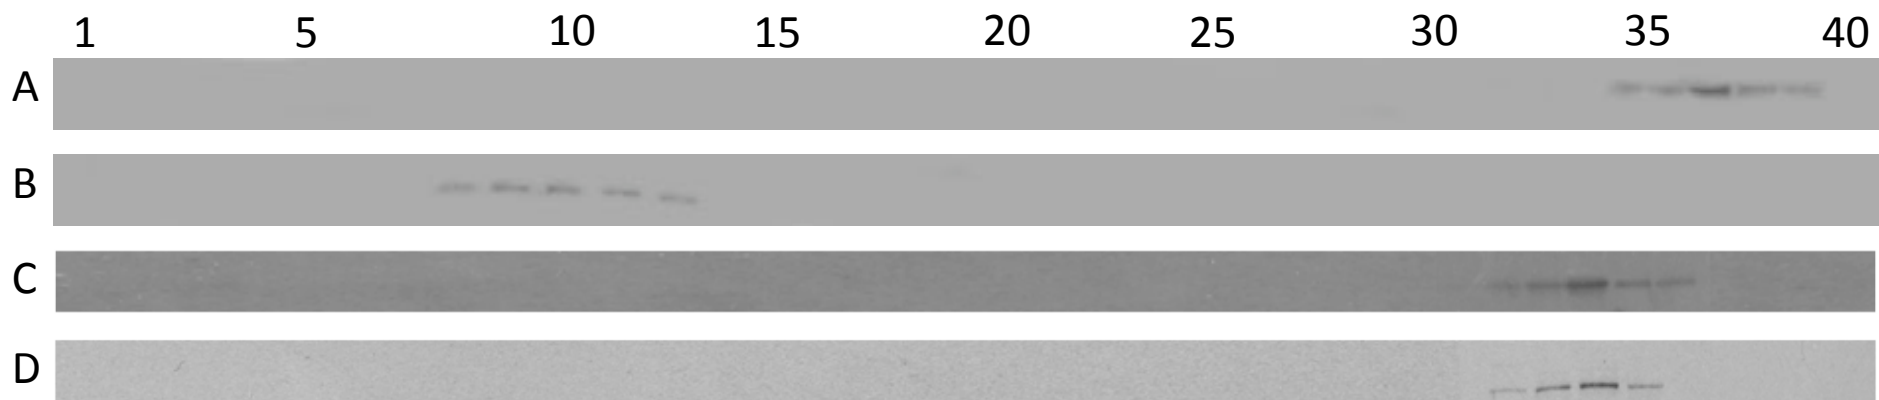

SAR-1

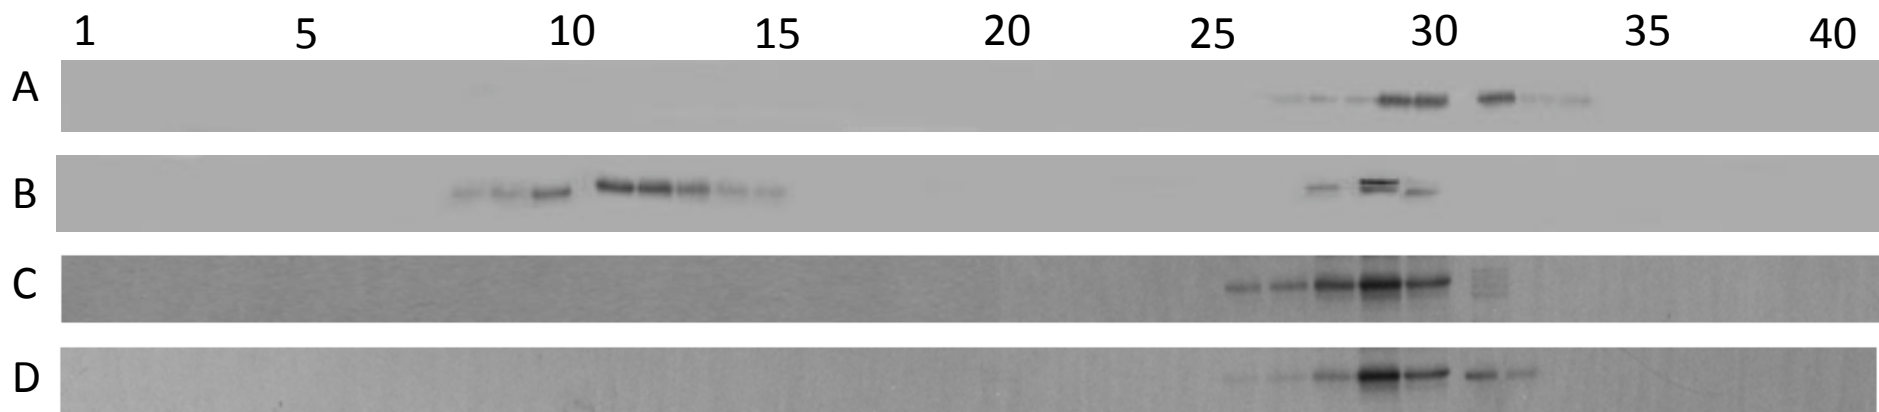

Sec24

Immunoblots showing the distribution of apoB48 and L-FABP across the Sephacryl S400 column as indicated. These data are the original data from which the data shown in Figs. 7 and 8 were derived.

Fig. S5

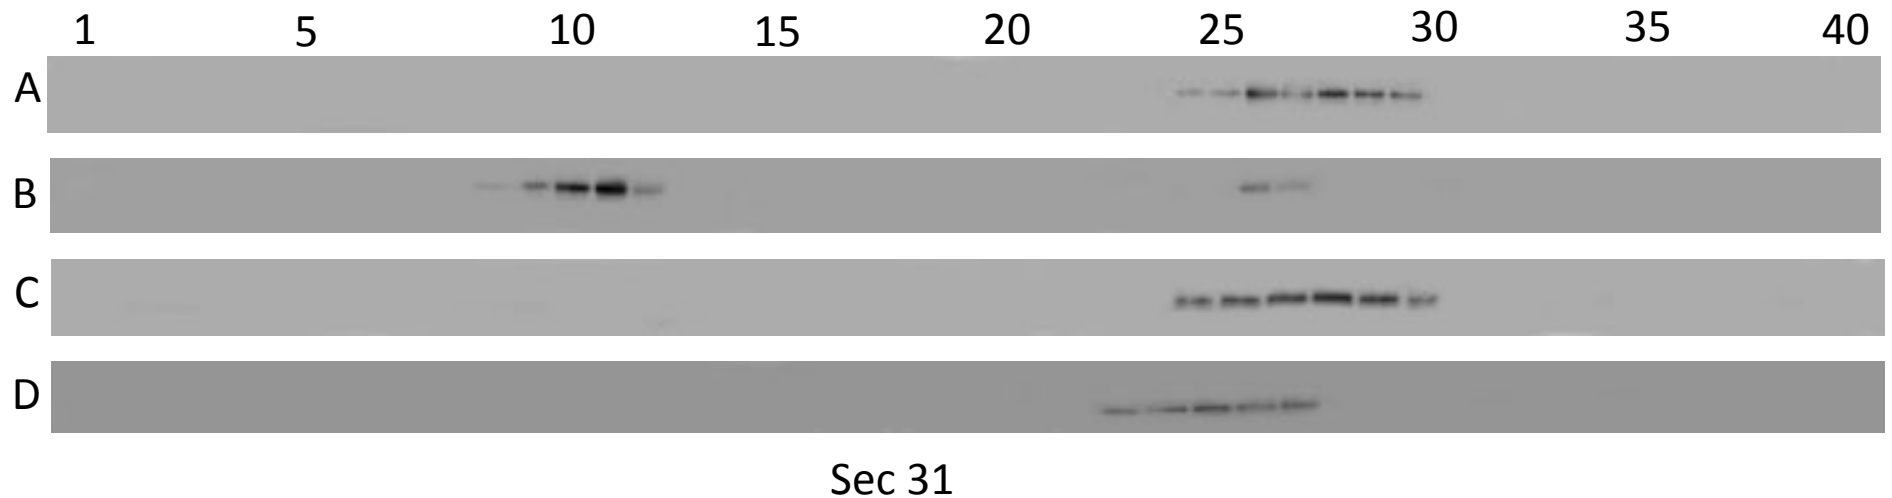

Immunoblots showing the distribution of apoB48 and L-FABP across the Sephacryl S400 column as indicated. These data are the original data from which the data shown in Fig. 9. was derived.

Fig. S6

# SAR1

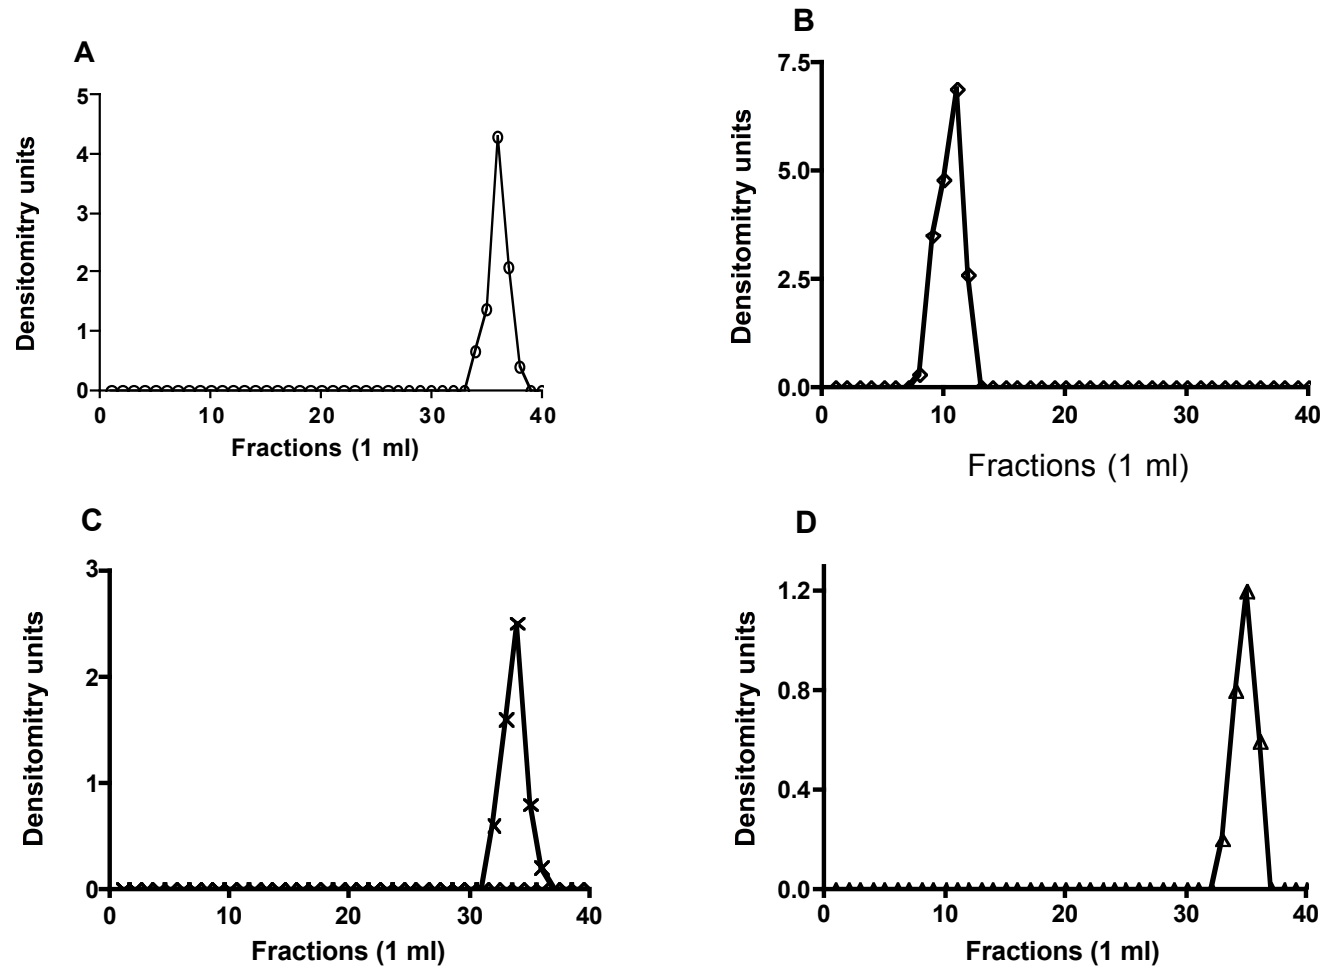

Fig. S7

# Sec 24C

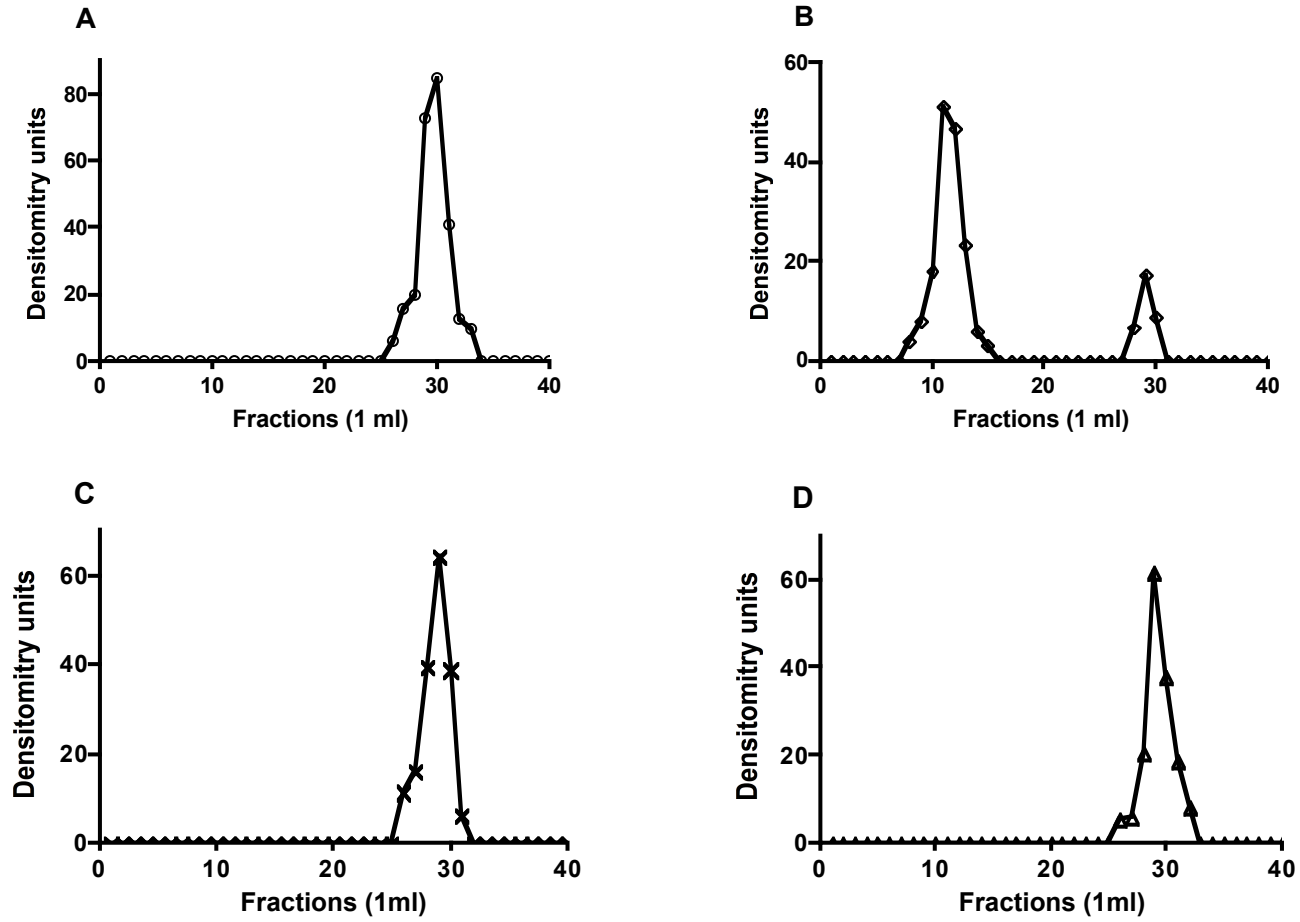

Fig. S8



# Sec31

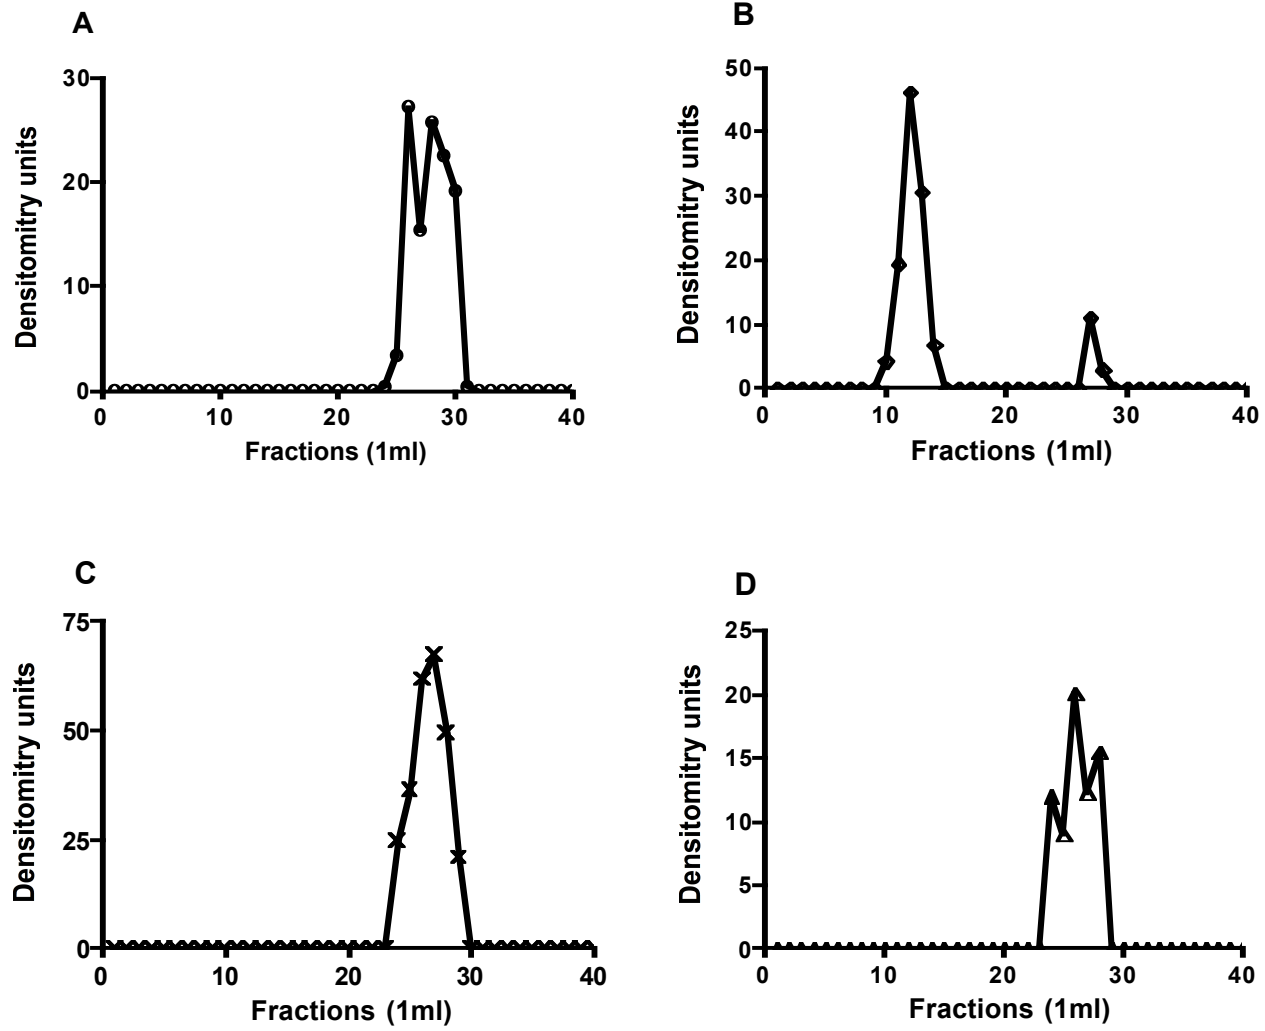

Fig. S9

### **Legend to Supplementary Figures:**

Figure S1: Increasing amounts of anti-VAMP7 antibody progressively reduces PCTV budding activity from intestinal ER. Progressively more anti-VAMP7 antibody was incubated with intestinal <sup>3</sup>H-TAG loaded ER as indicated (Methods). The excess antibodies were removed by washing and a PCTV budding assay performed on the resulting ER. ER budding activity when no antibody was added was set to 100%. The data are the mean  $\pm$  SEM, N=4.

Figure S7: Distribution of ER-Sar1 across a Sephacryl S-400 HR column under differing conditions. Native ER membranes (1mg prot) were incubated with: no cytosol (A), cytosol plus ATP (B), rL-FABP (C), PKC $\zeta$  depleted cytosol and urea washed ER (D). The treated ER was solubilized, chromatographed, and the eluate immunoblotted for Sar1. The band densities were determined as in Figure 1 and reported in arbitrary units on the ordinate.

Figure S8: Distribution of ER-Sec24C across a Sephacryl S-400 HR column under differing conditions. Native ER membranes (1mg prot) were incubated with: no cytosol (A), cytosol plus ATP (B), rL-FABP (C), PKC $\zeta$  depleted cytosol and urea washed ER (D). The treated ER was solubilized, chromatographed, and the eluate immunoblotted for Sec24C. The band densities were determined as in Figure 1 and reported in arbitrary units on the ordinate.

Figure S9: Distribution of ER-Sec31 across a Sephacryl S-400 HR column under differing conditions. Native ER membranes (1mg prot) were incubated with: no cytosol (A), cytosol plus ATP (B), rL-FABP (C), PKC $\zeta$  depleted cytosol and urea washed ER (D). The treated ER was solubilized, chromatographed, and the eluate immunoblotted for Sec31. The band densities were determined as in Figure 1 and reported in arbitrary units on the ordinate.
